# Supplementary material
Source: PubMed Central journal article supplement (PMC7245935)
Supplement: NIHMS1581063-supplement-Supplementary_Content.pdf [file NIHMS1581063-supplement-Supplementary_Content.pdf]

## Supplementary Online Content

Gaither JR, Leventhal JM, Ryan SA, Camenga DR. National trends in hospitalizations for opioid poisonings among children and adolescents, 1997 to 2012. *JAMA Pediatr*. Published online October 31, 2016. doi:10.1001/jamapediatrics.2016.2154

**eTable 1.** Weighted National Estimates of Hospitalization Rates for Opioid Poisonings by Year

**eTable 2.** Weighted National Estimates of Hospitalization Rates for Opioid Poisonings Among Adolescents Aged 15 to 19 Years

This supplementary material has been provided by the authors to give readers additional information about their work.

**eTable 1.** Weighted National Estimates of Hospitalization Rates for Opioid Poisonings by Year

| Characteristic            | Incidence per 100 000 Population by Study Year |      |      |      |       |       |
|---------------------------|------------------------------------------------|------|------|------|-------|-------|
|                           | 1997                                           | 2000 | 2003 | 2006 | 2009  | 2012  |
| Age group, y <sup>a</sup> |                                                |      |      |      |       |       |
| 1-4                       | 0.86                                           | 0.95 | 1.34 | 1.53 | 2.32  | 2.62  |
| 10-14                     | 0.87                                           | 0.85 | 1.15 | 1.03 | 1.16  | 1.31  |
| 15-19                     | 3.69                                           | 5.50 | 7.67 | 8.94 | 10.94 | 10.17 |

<sup>a</sup>Estimates for the group aged 5 to 9 years do not meet the criteria for statistical reliability and are not shown.

**eTable 2.** Weighted National Estimates of Hospitalization Rates for Opioid Poisonings Among Adolescents Aged 15 to 19 Years

| Attribution of Poisoning  | Incidence per 100 000 Population by Study Year |      |      |      |       |       |
|---------------------------|------------------------------------------------|------|------|------|-------|-------|
|                           | 1997                                           | 2000 | 2003 | 2006 | 2009  | 2012  |
| Accidental                | 0.63                                           | 1.03 | 1.82 | 2.75 | 3.39  | 2.54  |
| Suicide or self-inflicted | 2.42                                           | 3.61 | 4.18 | 3.97 | 5.47  | 5.82  |
| Heroin                    | 0.96                                           | 1.32 | 1.18 | 1.66 | 1.73  | 2.51  |
| Prescription opioids      | 3.69                                           | 5.50 | 7.67 | 8.94 | 10.94 | 10.17 |
